# Supplementary material for: Rapid and Non-Destructive Techniques for the Discrimination of Ripening Stages in Candonga Strawberries
Source: MDPI journal article supplement (doi:10.3390/foods11111534), 2022-05-24
Supplement: s1 [file s1]

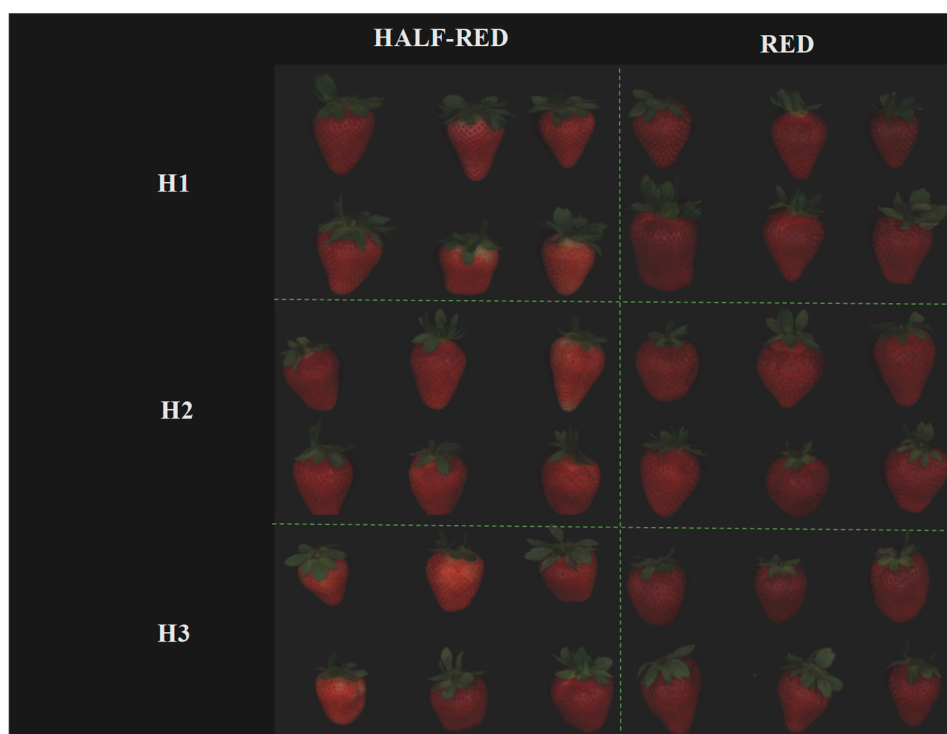

Figure S1. Half-red (in ripening phase, fully expanded and 50% red), and Red (in ripening phase, fully expanded and 100% red) Candonga strawberries used in the experiment.
